# Supplementary material
Source: publisher figshare collection journal article supplement (https://frontiersin.figshare.com/ndownloader/files/34640117)
Supplement: Supplementary file [file 34640117]

## *Supplementary Material*

### **1 Supplementary Tables**

#### **1.1 Supplementary Table 1** Items used for the assessment of time use and depressive symptoms.

| Reference Name                               | Item                                                                                                                                                                    |
|----------------------------------------------|-------------------------------------------------------------------------------------------------------------------------------------------------------------------------|
| Depressive Symptoms (PHQ-9)                  |                                                                                                                                                                         |
| Anhedonia                                    | Little interest or pleasure in doing things                                                                                                                             |
| Sad Mood                                     | Feeling down, depressed, or hopeless                                                                                                                                    |
| Sleep                                        | Trouble falling or staying asleep, or sleeping too much                                                                                                                 |
| Energy                                       | Feeling tired or having little energy                                                                                                                                   |
| Appetite                                     | Poor appetite or overeating                                                                                                                                             |
| Guilty                                       | Feeling bad about yourself - or that you are a failure or have let yourself or your family down                                                                         |
| Concentration                                | Trouble concentrating on things, such as reading the newspaper or watching television                                                                                   |
| Motor                                        | Moving or speaking so slowly that other people could have noticed Or the opposite - being so fidgety or restless that you have been moving around a lot more than usual |
| Suicide                                      | Thoughts that you would be better off dead, or of hurting yourself in some way                                                                                          |
| Time use (measured by an adaption of IPAQ-L) |                                                                                                                                                                         |
| Heavy Work Activities                        | Weekly minutes spent on vigorous-intensity physical activities during work, farming, and housework                                                                      |
| Moderate Work Activities                     | Weekly minutes spent on moderate-intensity physical activities during work, farming, and housework                                                                      |
| Traffic Time                                 | Weekly minutes spent on walking or cycling for transport                                                                                                                |
| Heavy Leisure Activities                     | Weekly minutes spent on vigorous-intensity leisure activities such as long-distance running, swimming, and playing football                                             |
| Moderate Leisure Activities                  | Weekly minutes spent on moderate-intensity leisure activities such as quick walking and performing Tai Chi                                                              |
| TV Time                                      | Weekly minutes spent on TV watching                                                                                                                                     |
| Computer Use                                 | Weekly minutes spent on computer use                                                                                                                                    |
| Video Game                                   | Weekly minutes spent on video game                                                                                                                                      |
| Sleep Duration                               | Weekly minutes spent on sleep                                                                                                                                           |

PHQ-9: 9-item Patient Health Questionnaire;

IPAQ-L : International Physical Activity Questionnaire.

## 1.2 Supplementary Table 2 Estimated edge weights of the network without control variables.

|                             | Heavy Work Activities | Moderate Work Activities | Traffic Time | Heavy Leisure Activities | Moderate Leisure Activities | TV Time | Computer Use | Video Games | Sleep Duration | Anhedonia | Sad Mood | Sleep | Energy | Appetite | Guilty | Concentration | Motor | Suicide |
|-----------------------------|-----------------------|--------------------------|--------------|--------------------------|-----------------------------|---------|--------------|-------------|----------------|-----------|----------|-------|--------|----------|--------|---------------|-------|---------|
| Heavy Work Activities       | 0                     | 0                        | 0.075        | 0                        | 0                           | 0       | -0.11        | 0           | 0              | 0         | 0        | 0     | 0      | 0        | 0      | 0             | 0     | 0       |
| Moderate Work Activities    | 0                     | 0                        | 0.139        | 0                        | 0                           | 0       | -0.09        | 0           | 0              | 0         | 0        | 0     | 0      | 0        | 0      | 0             | 0     | 0       |
| Traffic Time                | 0.075                 | 0.139                    | 0            | 0.106                    | 0                           | 0       | 0            | 0           | 0              | 0         | 0        | 0     | 0      | 0        | 0      | 0             | 0     | 0       |
| Heavy Leisure Activities    | 0                     | 0                        | 0.106        | 0                        | 0.407                       | 0       | 0.094        | 0.064       | 0              | 0         | 0        | 0     | 0      | 0        | 0      | 0             | 0     | 0       |
| Moderate Leisure Activities | 0                     | 0                        | 0            | 0.407                    | 0                           | 0       | 0            | 0           | 0              | 0         | 0        | 0     | 0      | 0        | 0      | 0             | 0     | 0       |
| TV Time                     | 0                     | 0                        | 0            | 0                        | 0                           | 0       | -0.02        | 0.016       | 0              | 0         | 0        | 0     | 0      | 0        | 0      | 0             | 0     | 0       |
| Computer Use                | -0.11                 | -0.09                    | 0            | 0.094                    | 0                           | -0.02   | 0            | 0.265       | 0              | 0.026     | 0        | 0     | 0      | 0        | 0.023  | 0             | 0.025 | -0.01   |
| Video Games                 | 0                     | 0                        | 0            | 0.064                    | 0                           | 0.016   | 0.265        | 0           | 0              | 0         | 0        | 0     | 0      | 0        | 0      | 0             | 0     | 0       |
| Sleep Duration              | 0                     | 0                        | 0            | 0                        | 0                           | 0       | 0            | 0           | 0              | 0         | 0        | 0     | 0      | 0        | 0      | 0             | 0     | 0       |
| Anhedonia                   | 0                     | 0                        | 0            | 0                        | 0                           | 0       | 0.026        | 0           | 0              | 0         | 0.243    | 0     | 0.035  | 0        | 0.085  | 0.23          | 0.08  | 0.031   |
| Sad Mood                    | 0                     | 0                        | 0            | 0                        | 0                           | 0       | 0            | 0           | 0              | 0.243     | 0        | 0.267 | 0.11   | 0.049    | 0.178  | 0.052         | 0.148 | 0       |
| Sleep                       | 0                     | 0                        | 0            | 0                        | 0                           | 0       | 0            | 0           | 0              | 0         | 0.267    | 0     | 0.278  | 0.104    | 0.056  | 0             | 0     | 0       |
| Energy                      | 0                     | 0                        | 0            | 0                        | 0                           | 0       | 0            | 0           | 0              | 0.035     | 0.11     | 0.278 | 0      | 0.293    | 0      | 0.151         | 0     | 0       |
| Appetite                    | 0                     | 0                        | 0            | 0                        | 0                           | 0       | 0            | 0           | 0              | 0         | 0.049    | 0.104 | 0.293  | 0        | 0.011  | 0             | 0.019 | 0       |
| Guilty                      | 0                     | 0                        | 0            | 0                        | 0                           | 0       | 0.023        | 0           | 0              | 0.085     | 0.178    | 0.056 | 0      | 0.011    | 0      | 0.292         | 0.107 | 0.049   |
| Concentration               | 0                     | 0                        | 0            | 0                        | 0                           | 0       | 0            | 0           | 0              | 0.23      | 0.052    | 0     | 0.151  | 0        | 0.292  | 0             | 0.178 | 0.082   |
| Motor                       | 0                     | 0                        | 0            | 0                        | 0                           | 0       | 0.025        | 0           | 0              | 0.08      | 0.148    | 0     | 0      | 0.019    | 0.107  | 0.178         | 0     | 0.262   |
| Suicide                     | 0                     | 0                        | 0            | 0                        | 0                           | 0       | -0.01        | 0           | 0              | 0.031     | 0        | 0     | 0      | 0        | 0.049  | 0.082         | 0.262 | 0       |

Note: All time use behaviors were standardized; P values were presented in parentheses.

1.3    **Supplementary Table 3** Estimated edge weights of the network with control variables.

|                             | Heavy Work Activities | Moderate Work Activities | Traffic Time | Heavy Leisure Activities | Moderate Leisure Activities | TV Time | Computer Use | Video Games | Sleep Duration | Anhedonia | Sad Mood | Sleep | Energy | Appetite | Guilty | Concentration | Motor | Suicide | Female | Age   | BMI | Drinking | Smoking |
|-----------------------------|-----------------------|--------------------------|--------------|--------------------------|-----------------------------|---------|--------------|-------------|----------------|-----------|----------|-------|--------|----------|--------|---------------|-------|---------|--------|-------|-----|----------|---------|
| Heavy Work Activities       | 0                     | 0                        | 0.07         | 0                        | 0                           | 0       | -0.11        | 0           | 0              | 0         | 0        | 0     | 0      | 0        | 0      | 0             | 0     | 0       | -0.11  | 0     | 0   | 0        | 0.044   |
| Moderate Work Activities    | 0                     | 0                        | 0.143        | 0                        | 0                           | 0       | -0.09        | 0           | 0              | 0         | 0        | 0     | 0      | 0        | 0      | 0             | 0     | 0       | 0.108  | 0     | 0   | 0        | 0       |
| Traffic Time                | 0.07                  | 0.143                    | 0            | 0.108                    | 0                           | 0       | 0            | 0           | 0              | 0         | 0        | 0     | 0      | 0        | 0      | 0             | 0     | 0       | 0      | 0     | 0   | 0        | 0       |
| Heavy Leisure Activities    | 0                     | 0                        | 0.108        | 0                        | 0.407                       | 0       | 0.089        | 0.06        | 0              | 0         | 0        | 0     | 0      | 0        | 0      | 0             | 0     | 0       | -0.09  | -0.02 | 0   | 0        | 0       |
| Moderate Leisure Activities | 0                     | 0                        | 0            | 0.407                    | 0                           | 0       | 0            | 0           | 0              | 0         | 0        | 0     | 0      | 0        | 0      | 0             | 0     | 0       | 0      | 0     | 0   | 0        | 0       |
| TV Time                     | 0                     | 0                        | 0            | 0                        | 0                           | 0       | -0.02        | 0.019       | 0              | 0         | 0        | 0     | 0      | 0        | 0      | 0             | 0     | 0       | 0      | 0     | 0   | 0        | 0       |
| Computer Use                | -0.11                 | -0.09                    | 0            | 0.089                    | 0                           | -0.02   | 0            | 0.261       | 0              | 0.019     | 0        | 0     | 0      | 0        | 0.022  | 0             | 0.023 | -0.01   | -0.03  | 0     | 0   | 0        | 0.06    |
| Video Games                 | 0                     | 0                        | 0            | 0.06                     | 0                           | 0.019   | 0.261        | 0           | 0              | 0         | 0        | 0     | 0      | 0        | 0      | 0             | 0     | 0       | -0.09  | 0     | 0   | 0        | 0       |
| Sleep Duration              | 0                     | 0                        | 0            | 0                        | 0                           | 0       | 0            | 0           | 0              | 0         | 0        | 0     | 0      | 0        | 0      | 0             | 0     | 0       | 0      | 0     | 0   | 0        | 0       |
| Anhedonia                   | 0                     | 0                        | 0            | 0                        | 0                           | 0       | 0.019        | 0           | 0              | 0         | 0.241    | 0     | 0.031  | 0        | 0.082  | 0.226         | 0.077 | 0.024   | 0      | 0     | 0   | 0        | 0       |
| Sad Mood                    | 0                     | 0                        | 0            | 0                        | 0                           | 0       | 0            | 0           | 0              | 0.241     | 0        | 0.267 | 0.103  | 0.051    | 0.178  | 0.052         | 0.148 | 0       | 0      | 0     | 0   | 0        | 0       |
| Sleep                       | 0                     | 0                        | 0            | 0                        | 0                           | 0       | 0            | 0           | 0              | 0         | 0.267    | 0     | 0.278  | 0.098    | 0.052  | 0             | 0     | 0       | 0      | 0     | 0   | 0        | 0       |
| Energy                      | 0                     | 0                        | 0            | 0                        | 0                           | 0       | 0            | 0           | 0              | 0.031     | 0.103    | 0.278 | 0      | 0.295    | 0      | 0.149         | 0     | 0       | 0      | 0     | 0   | 0        | 0       |
| Appetite                    | 0                     | 0                        | 0            | 0                        | 0                           | 0       | 0            | 0           | 0              | 0         | 0.051    | 0.098 | 0.295  | 0        | 0.011  | 0             | 0.011 | 0       | 0      | 0     | 0   | 0        | 0       |
| Guilty                      | 0                     | 0                        | 0            | 0                        | 0                           | 0       | 0.022        | 0           | 0              | 0.082     | 0.178    | 0.052 | 0      | 0.011    | 0      | 0.29          | 0.107 | 0.051   | 0      | 0     | 0   | 0        | 0       |
| Concentration               | 0                     | 0                        | 0            | 0                        | 0                           | 0       | 0            | 0           | 0              | 0.226     | 0.052    | 0     | 0.149  | 0        | 0.29   | 0             | 0.177 | 0.078   | 0      | 0     | 0   | 0        | 0       |
| Motor                       | 0                     | 0                        | 0            | 0                        | 0                           | 0       | 0.023        | 0           | 0              | 0.077     | 0.148    | 0     | 0      | 0.011    | 0.107  | 0.177         | 0     | 0.262   | 0      | 0     | 0   | 0        | 0       |
| Suicide                     | 0                     | 0                        | 0            | 0                        | 0                           | 0       | -0.01        | 0           | 0              | 0.024     | 0        | 0     | 0      | 0        | 0.051  | 0.078         | 0.262 | 0       | 0      | 0     | 0   | 0        | 0       |
| Female                      | -0.11                 | 0.108                    | 0            | -0.09                    | 0                           | 0       | -0.03        | -0.09       | 0              | 0         | 0        | 0     | 0      | 0        | 0      | 0             | 0     | 0       | 0      | 0     | 0   | -0.7     | -1.82   |
| Age                         | 0                     | 0                        | 0            | -0.02                    | 0                           | 0       | 0            | 0           | 0              | 0         | 0        | 0     | 0      | 0        | 0      | 0             | 0     | 0       | 0      | 0     | 0   | 0        | 0       |
| BMI                         | 0                     | 0                        | 0            | 0                        | 0                           | 0       | 0            | 0           | 0              | 0         | 0        | 0     | 0      | 0        | 0      | 0             | 0     | 0       | 0      | 0     | 0   | 0        | 0       |
| Drinking                    | 0                     | 0                        | 0            | 0                        | 0                           | 0       | 0            | 0           | 0              | 0         | 0        | 0     | 0      | 0        | 0      | 0             | 0     | 0       | -0.7   | 0     | 0   | 0        | 0.418   |
| Smoking                     | 0.044                 | 0                        | 0            | 0                        | 0                           | 0       | 0.06         | 0           | 0              | 0         | 0        | 0     | 0      | 0        | 0      | 0             | 0     | 0       | -1.82  | 0     | 0   | 0.418    | 0       |

Note: All time use behaviors were standardized; P values were presented in parentheses.

## 2 Supplementary Figures

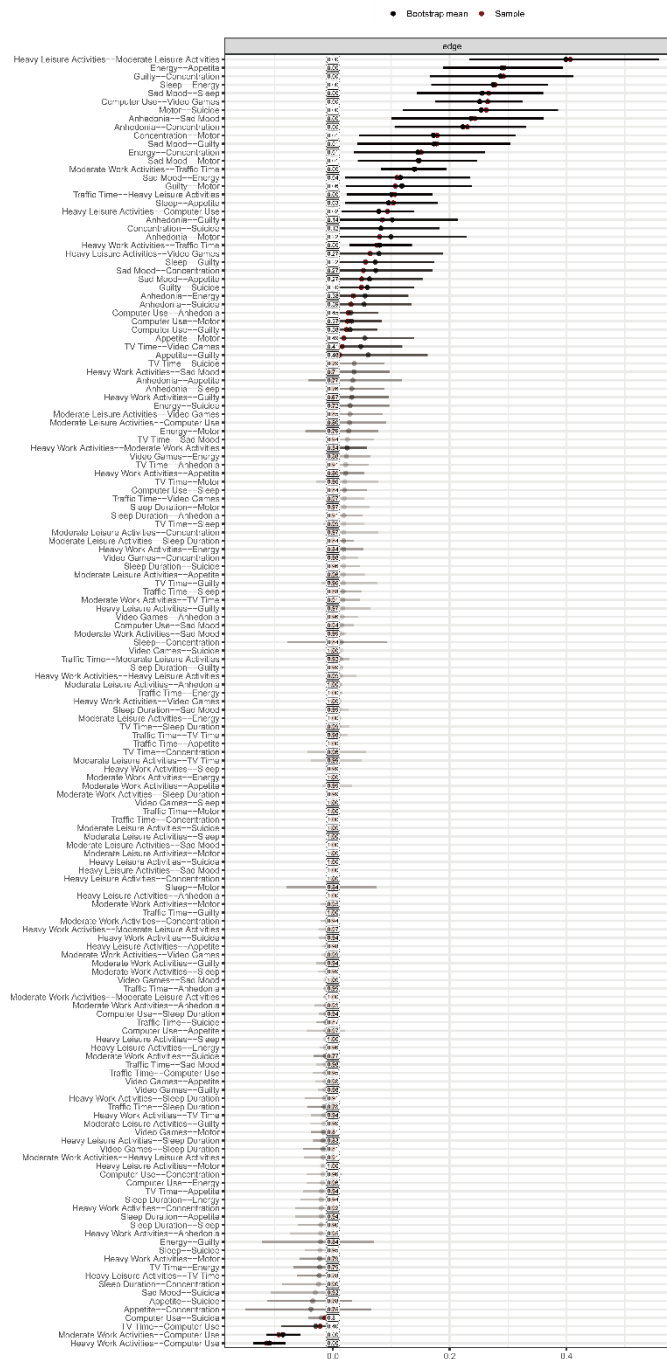

**2.1 Supplementary Figure 1** Accuracy of edge weights of the network without control variables. The x-axis indicates the edge weights, and the y-axis indicates the nodes linked by the edges. The black dots denote the mean value of the bootstrapped edge weights, and the red dots denote the edge weights from current sample. The black lines denote the 95% confidence intervals of the bootstrapped sample.

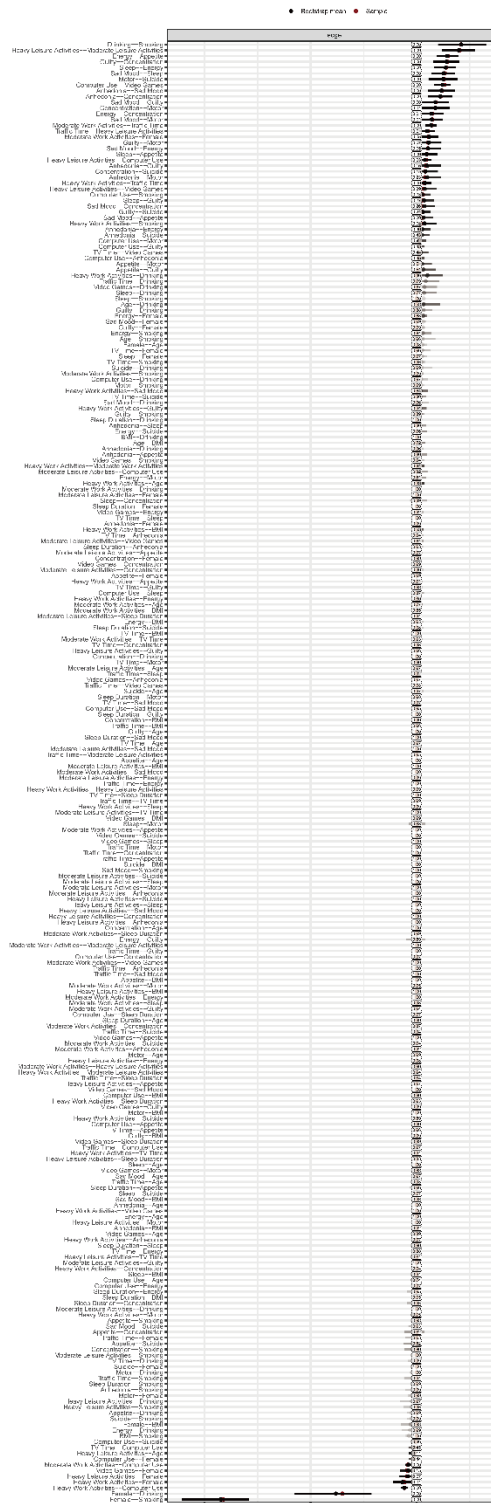

**2.2 Supplementary Figure 2** Accuracy of edge weights of the network with control variables. The x-axis indicates the edge **weights**, and the y-axis indicates the nodes linked by the edges. The black dots denote the mean value of the bootstrapped edge **weights**, and the red dots denote the edge weights from current sample. The black lines denote the 95% confidence intervals of the bootstrapped sample.
